1  
2  
3  
4  
5  
6  
7  
8  
9  
10  
11  
12  
13  
14  
15  
16  
17  
18  
19

**By the numbers and in their own words: A mixed methods study of unmet needs and humanitarian inclusion of older Syrian refugees in Lebanon**

Sarah Al Omari<sup>1\*</sup>, Gladys Honein-AbouHaidar<sup>2,3</sup>, Abla Mehio Sibai<sup>1</sup>

<sup>1</sup> Department of Epidemiology and Population Health, Faculty of Health Sciences, American University of Beirut, Beirut, Lebanon

<sup>2</sup> Hariri School of Nursing, American University of Beirut, Beirut, Lebanon

<sup>3</sup> Refugee Health Program, Global Health Institute, American University of Beirut, Beirut, Lebanon

\*Corresponding author

E-mail: [sia34@mail.aub.edu](mailto:sia34@mail.aub.edu) (SAO)

## 20 **Abstract**

21 Older people constitute an overlooked vulnerable population in humanitarian crises. Lebanon is a  
22 small country that hosts the largest number of refugees per capita in the world. With  
23 exacerbating socioeconomic conditions, exclusionary policies against refugees, and a fragmented  
24 humanitarian system, the status of older Syrian refugees (OSRs) requires special attention. This  
25 study aimed to explore OSRs' unmet needs, coping strategies, available humanitarian services,  
26 and some indicators of the humanitarian inclusion standards focusing on the shelter, health,  
27 nutrition and food security, and water, sanitation and hygiene sectors. We conducted a  
28 convergent mixed-methods study between December 2021 and March 2022 in the North and  
29 Bekaa, including a cross-sectional survey with 461 participants and 14 semi-structured  
30 interviews. Results show that OSRs lived in inappropriate shelters (cold, leaking rainwater),  
31 especially in informal tented settlements. High rent prices pushed refugee households with  
32 elderly to prioritize paying rent at the expense of other needs such as food and medication,  
33 particularly when food cash transfer is the sole source of income, jeopardizing food security and  
34 intake. Access to dignifying and accessible bathing facilities was compromised in ITSs with  
35 shared facilities. Substantial medical costs hindered OSRs access to healthcare such as surgeries.  
36 Due to the crisis, chronic medications are not always available in dispensaries for subsidized  
37 cost, pushing OSRs to non-compliance and selling food assistance to buy medications. Soaring  
38 fuel prices hindered OSRs access to heating and transportation to receive healthcare. No efforts  
39 were reported in collecting data on OSRs' needs, targeting them with information on services, or  
40 soliciting feedback for programming, especially in the absence of any age-tailored interventions.  
41 Findings shed light on the precarious living conditions of OSRs in Lebanon and add to the body

42 of evidence documenting their invisibility to the humanitarian response. An age-inclusive  
43 response is needed through holistic, tailored, and sustainable interventions.

## 44 **Introduction**

45 The intersection of accelerating population ageing with steady rise in man-made and natural  
46 disasters poses tremendous risks on older populations in low- and middle-income countries  
47 disproportionately affected by disasters [1-3]. Older populations in disaster settings are  
48 particularly vulnerable, making up to 4% of UNHCR's overall population of concern [4]. The  
49 intersection between the normative challenges of ageing, such as the significant decline in  
50 physical, cognitive, and psychosocial wellbeing on one hand, and the horrific circumstances of  
51 disasters and forced migration on the other hand, ranks elderly populations as a highly vulnerable  
52 segment with very specific needs. Risks that older people face in disasters include being left  
53 behind, physical injury, mental traumatization and illness, loss of loved ones either through death  
54 or separation, loneliness, and the loss of economic opportunities, social status and roles [5-7].

55 A multitude of policies and guidelines developed by international organizations acknowledge the  
56 particularities of elderly's needs in crises and the approaches to ensure an inclusive response at  
57 all levels of programming [6, 8-10]. Unfortunately, the gap between policies and action is too  
58 wide, showing a systematic exclusion of elderly refugees from the humanitarian response, a  
59 phenomenon that has been attributed to ageist perceptions and practices in the humanitarian  
60 realm [5, 6, 11-15]. Exclusion is marked at different stages of the response. Specific older-age  
61 policies are lacking in many organizations, data collection is not disaggregated by age at pre-  
62 assessment levels, programming is not age-conscious especially in health and nutrition, and  
63 monitoring and evaluation activities do not report on indicators specific to elderly, or present

64 age-disaggregated findings to assess program performance [12, 15]. At another level, the  
65 proportion of humanitarian funding channeled towards the needs of elderly refugees for elderly  
66 refugees is negligible [16].

67 The situation becomes grimmer when nested within a multi-dimensional crisis, as is the case in  
68 Lebanon. Lebanon, this small middle income country bordering Syria, hosts the largest number  
69 of refugees per capita in the world, with an estimated 1.5 million Syrian refugees, of whom 2.6%  
70 are above 60 years of age [17]. Lebanon is not signatory on the 1951 Refugee Convention, and  
71 its refugee legal policies and legislations are exclusionary [18-21]. Since September 2019,  
72 Lebanon has been suffering from a myriad of overlapping crises, including dramatic currency  
73 devaluation, collapse of many public services, political turmoil, the COVID-19 pandemic effects,  
74 and the infamous Beirut Blast, all exacerbating a protracted refugee crisis that has strained pre-  
75 existing fragmented systems.

76 In order to strengthen the accountability of humanitarian actors towards older people and people  
77 with disabilities within a clearly defined framework, the Age and Disability Consortium as part  
78 of the Age and Disability Capacity Program (ADCAP) published in 2018 the “Humanitarian  
79 Inclusion Standards for Older People and People with Disabilities” [22]. These standards (HISs)  
80 aim to guide humanitarian action in responding to the needs and leveraging the capacities of  
81 older people and people with disabilities, ensuring an inclusive and participatory humanitarian  
82 response, from organizational policies and advocacy to programming and field training. The nine  
83 inclusion standards include: identification, safe and equitable access, resilience, knowledge and  
84 participation, feedback and complaints, coordination, learning, human resources, and resources  
85 management. In addition, a set of seven sector-specific standards are presented for shelter,  
86 settlement and household items, health, education, nutrition, food security and livelihoods, and

87 protection. These sector-specific standards are mainly designed around three areas, which can be  
88 mapped under some of the nine standards: data and information management (under  
89 identification), addressing barriers (under safe and equitable access), and participation of older  
90 people and people with disabilities and strengthening of their capacities (under knowledge and  
91 participation, and resilience). In 2020, it was made part of the Sphere Humanitarian Standards  
92 Partnership [22].

93 While multiple studies have been conducted with older Syrian refugees (OSRs) in Lebanon [14,  
94 23-26], and other neighboring countries [27-30], an extensive needs assessment with a focus on  
95 their reports and perceptions of inclusion is missing. This study guided by a human-rights lens is  
96 looking at a population with a myriad of intersecting vulnerabilities to emphasize its right to  
97 access humanitarian assistance. It aims to inform about the existing unmet needs and the status of  
98 humanitarian inclusion of OSRs in Lebanon. A convergent parallel mixed methods design is  
99 used, where both quantitative and qualitative data are collected in parallel, analyzed separately,  
100 and then merged [31].

101 The quantitative component in this study will measure the distribution of unmet needs, as well as  
102 indicators of humanitarian assistance and inclusion across four sectors: shelter, health, nutrition,  
103 and water, sanitation, and hygiene (WASH). The qualitative component will explore OSRs  
104 perceptions and experiences with unmet needs and their assessment of access to assistance. The  
105 reason for collecting both types of data is to validate and triangulate findings and to bring greater  
106 insight than would be obtained by either type exclusively.

107 In other words, we aim in this study to answer the following questions:

108           What are the unmet needs of OSRs in Lebanon in the shelter, health, nutrition, and  
109           WASH sectors? What are existing coping strategies given the existing adversities?  
110           What types of assistance are OSRs receiving in these sectors? What assistance can't they  
111           access? Why?  
112           To what extent is the humanitarian response across the different sectors inclusive of  
113           OSRs as reflected through a number of indicators constructed from the ADCAP  
114           humanitarian inclusion standards?

## 115   **Methods**

116   A convergent parallel mixed methods design with equally weighted quantitative and qualitative  
117   strands was used. Both quantitative and qualitative data were collected in parallel, analyzed  
118   separately, and then merged [31]. In both arms of the study, two main themes were explored,  
119   namely unmet needs and inclusion in humanitarian services and assistance. While a set of  
120   detailed indicators and questions were used to inquire about issues and unmet needs in both  
121   arms, the HISs were used as a guiding framework to measuring and characterizing the inclusion  
122   status of OSRs on the humanitarian response in Lebanon. For the quantitative arm, a set of  
123   indicators were constructed under each of the HIS's: identification, safe and equitable access,  
124   knowledge and participation, feedback and complaints, and learning. Some of the formulated  
125   indicators were general, while others were sector-specific under shelter, health, nutrition, food  
126   security, or WASH. The same topics were also inquired and probed about in the qualitative  
127   interviews, soliciting views, perceptions, and experiences. The content of the research tools is  
128   detailed below.

## 129 **Setting of the study**

130 The study was carried out in December 2021 and March 2022 in Akkar, North, and Bekaa  
131 governorates in Lebanon. Those three areas contain an estimated 527,000 refugees, which is  
132 approximately 66% of the total Syrian refugee population in Lebanon [32]. Because the  
133 Lebanese government prevents the establishment of official refugee camps, Syrian refugees  
134 reside either in informal tented settlements often established on private, agricultural land, or rent  
135 private accommodations in towns and cities [19]. Almost 22%, 45%, and 8% of the population  
136 lives in informal tented settlements (ITSs), and 62%, 50% and 75% live in hosted communities  
137 in each of Akkar, Bekaa, and North respectively [33].

## 138 **Quantitative component**

### 139 **Sampling and recruitment**

140 A convenient and purposeful non-probability sampling strategy has been employed due to the  
141 lack of a sampling frame. We recruited a local humanitarian agency active in providing field  
142 services in the Akkar, Bekaa, and North governorates to allow us access to the refugee  
143 communities and collect data. At a first stage, the agency was instructed by the research team to  
144 provide a list of recruitment sites, both informal tented settlements and hosted community  
145 clusters, that are also diverse in terms of humanitarian service coverage and living conditions.  
146 The list also included an enumeration of older Syrian refugees aged 50 or above per site through  
147 the agency's focal points. The final total sample size of 461 was determined by budget and time  
148 constraints.

## 149 **Survey tool**

150 The survey instrument consisted of several sections. It began with sociodemographic,  
151 socioeconomic, and household information. Next, we included a section on humanitarian  
152 assistance including questions on data collection, data access, and received assistance.  
153 Furthermore, sections for each of the sectors of inquiry were included: shelter, health, nutrition  
154 and food security, and WASH. Under each of these sections, we questions inquired about unmet  
155 needs, as well as sector-specific inclusion indicator questions.

156 Under health, the following constructs were solicited to assess needs: experiencing pain,  
157 disability including activities of daily living (ADL) and instrumental activities of daily living  
158 (IADL), chronic diseases, adherence to medications, and associated barriers. We incorporated  
159 and adapted questions from the Katz index for ADL, the Lawton index for IADL, and the  
160 Washington Group scale for disability to assess disability [34-36]. Finally, we inquired about  
161 access to primary healthcare (PHC) and hospitalization.

162 As for nutrition and food insecurity, indicators from the HelpAge's Rapid Assessment Method  
163 for Older People were used including: meal frequency, food diversity and nutrient consumption,  
164 and food coping strategies [37]. Indicators under food group consumption were compiled to form  
165 the Diet Diversity Score, a measure that ranges from 0 to 11 and consists of the number of food  
166 groups consumed in the last 24 hours. Furthermore, the Household Hunger Scale score, a  
167 measure of severe food insecurity, was calculated based on question on food coping strategies.  
168 The scale categorizes the household in which the elderly lives into living under either "extreme  
169 hunger", "moderate hunger", and "little or no hunger" [37]. Finally, under shelter and WASH,  
170 OSRs were asked for their assessment of any problems with the shelter, water, latrines, as well as  
171 any humanitarian assistance and barriers.

172 The survey tool was uploaded into KOBO toolbox and data was collected on electronic tablets.



## 173 **Data collection**

174 A schedule for visiting the closer, then farther sites was set up with the research team, and the  
175 participants were purposefully approached such that the sample would produce an equal  
176 distribution by gender, a wide age range, and include home-bound older refugees. Two teams of  
177 four experienced data collectors each were mobilized to cover Akkar and North on one hand, and  
178 Bekaa on the other, and worked in parallel. All enumerators underwent a 2-day training  
179 workshop. Data collection began on December 16<sup>th</sup> and ended on the 31<sup>st</sup>. The survey consisted  
180 of face-to-face structured interviews; each interview took approximately 30-40 minutes. All field  
181 activities were supervised by members of the research team. In addition, the data collection  
182 procedure and tool were pilot-tested for two full days in both Akkar and Bekaa areas  
183 simultaneously, completing 36 interviews. This led to another round of training and tool  
184 refinement. Surveys collected in the pilot phase were not included in the analyses.

## 185 **Data analysis**

186 Descriptive statistics: Continuous variables were summarized using means and standard  
187 deviations, while proportions were presented to describe categorical variables.

188 Inferential statistics: Bivariate analysis employed Student's t-test to explore associations between  
189 a binary predictor and a continuous outcome. Chi-square test, Fisher's exact test, and Cochran  
190 Armitage trend tests were employed to test for relations between categorical variables. Binary  
191 and ordinal logistic regressions were performed to test for gender differences in binary and  
192 categorical outcomes while controlling for age. All tests were reported at the 0.05 significance  
193 level. Data were manipulated using Stata version 17.

## 194 **Qualitative component**

195 A descriptive qualitative methodology was employed to explore participants' perceptions and  
196 views on unmet needs and inclusion in humanitarian assistance and triangulate them with  
197 findings from the survey [38, 39].

## 198 **Sampling and Recruitment**

199 We purposefully selected a subsample of 14 informative participants from the quantitative  
200 component. The sample was also purposefully recruited to have a balanced gender composition  
201 and to include participants from both ITSs and hosted communities in the North and Bekaa areas  
202 wherever convenient.

## 203 **Topic guide**

204 A topic guide of semi-structured nature was prepared and included questions on: living  
205 conditions and unmet needs across the sectors of interest, coping strategies employed by the  
206 elderly, and inquiring about received assistance and humanitarian services offered to older  
207 refugees. Participants were probed to provide details on the difficulties they face accessing basic  
208 needs, facilitators and barriers towards accessing humanitarian assistance, and whether the  
209 humanitarian response is tailored to the needs of elderly at the data collection, programming, and  
210 accountability levels. In other words, the same HISs covered in the quantitative indicators were  
211 explored qualitatively in the semi-structured interviews, namely identification, safe and equitable  
212 access, knowledge and participation, feedback and complaints, and learning.

## 213 **Data collection**

214 Data were collected through audio-recording the face-to-face semi-structured interviews with the  
215 sub-sample of 14 participants between the 2<sup>nd</sup> and 29<sup>th</sup> of March, 2022. In-depth interviews were

216 carried out sequentially and stopped when data saturation was reached. Data was collected by the  
217 first author who conceptualized and designed the tools, and notes were taken during interviews  
218 by a trained and experienced research assistant. Both data collectors speak Arabic as their mother  
219 tongue and can fully communicate in the local Syrian dialect used by the OSRs. Interviews took  
220 place in the OSRs' households and after ensuring that only the elderly and the research team  
221 were present in the room.

## 222 **Data analysis**

223 Qualitative interviews recordings were first transcribed in verbatim, then transcriptions were  
224 analyzed using thematic analysis. Transcripts were coded deductively under concepts of unmet  
225 needs, coping strategies, and access to humanitarian assistance and services. Codes were then  
226 combined into sub-themes and themes to answer the research questions. Under each sector of  
227 interest, codes on existing issues, unmet needs, coping strategies, access to assistance, and  
228 inclusion concepts were extracted and analyzed.

## 229 **Integration and reporting of quantitative and qualitative arms**

230 We used the *merging* approach to integrate the results of the quantitative and qualitative  
231 components after they were both analyzed separately. Mixed methods results are reported in  
232 using a narrative *weaving* approach, where quantitative and qualitative results are written  
233 together on a theme-by-theme basis [31, 40]. Integration was conducted manually by the primary  
234 author (SAO) and validated by the second author (GHA). Findings were further discussed for  
235 concordance, discordance or expansion. Findings were reported based on Good Reporting of A  
236 Mixed Methods Study (GRAMMS) criteria (S1 Appendix) [41].

237 **Ethical considerations and clearance**

238 The study was approved by the Social and Behavioral Institutional Review Board at the  
239 American University of Beirut (ID: SBS-2021-0214). Due to COVID-19 restrictions at the time  
240 of data collection, verbal informed consent was solicited from each of the participants in both the  
241 quantitative and the qualitative components as dictated by the Board.

## 242 Results

### 243 Sample Profile: Sociodemographic and Household Information

244 All sociodemographic characteristics of the survey sample are summarized in Table 1. A total of  
245 461 OSRs participated in the survey with a median age of 57 years (IQR=11 years), with 59.65%  
246 from Bekaa, 29% from the North, and 40.35% from Akkar. The majority (73%) resided in ITSs,  
247 were female, both overall (56%) and per governorate, and most participants were married  
248 (70.5%) and illiterate (55.1%). Only 11.5% reported working, with significantly higher  
249 proportion of working males than females ( $p<0.001$ ). 96.7% belonged to households having an  
250 income of less than 75 USD per month, and 87% reported being in debt. Only 40 participants  
251 (8.7%) reported living alone in the household, out of those the majority were women (67.5%).  
252 Excluding households of elderly living alone, 86.5% of households were elderly headed, 70.6%  
253 of which being male-headed. Female heads of households (25.4%) were predominantly married  
254 (41%) or widowed (41%). Almost 55% of the households reported an elderly as the main  
255 breadwinner, 14% of which were female elderly.

256 **Table 1:** Summary sociodemographic and household characteristics of the survey sample

|                    | n   | %      |
|--------------------|-----|--------|
| Age (median (IQR)) |     |        |
| Area               |     |        |
| North              | 186 | 40.35% |
| Bekaa              | 275 | 59.65% |
| Governorate        |     |        |
| Akkar              | 52  | 11.28% |
| North              | 134 | 29.07% |
| Bekaa              | 275 | 59.65% |
| Site type          |     |        |
| ITS                | 336 | 72.89% |
| Hosted             | 125 | 27.11% |

|                                              | n   | %      |
|----------------------------------------------|-----|--------|
| Gender                                       |     |        |
| Male                                         | 203 | 44.03% |
| Female                                       | 258 | 55.97% |
| Education level                              |     |        |
| Illiterate                                   | 254 | 55.10% |
| Reads and writes                             | 49  | 10.63% |
| Elementary                                   | 77  | 16.70% |
| Middle school                                | 53  | 11.50% |
| High school                                  | 24  | 5.21%  |
| College/university                           | 4   | 0.87%  |
| Marital status                               |     |        |
| Never married                                | 11  | 2.39%  |
| Married                                      | 325 | 70.50% |
| Widowed                                      | 97  | 21.04% |
| Divorced                                     | 9   | 1.95%  |
| Separated                                    | 19  | 4.12%  |
| Type of elderly-headed household             |     |        |
| Male-elderly-headed household                | 270 | 58.57% |
| Female-elderly-headed household              | 134 | 29.07% |
| None-elderly-headed-household                | 57  | 12.36% |
| Elderly is main breadwinner in the household | 180 | 39.22% |
| The elderly has a caregiving role            | 263 | 62.47% |
| Elderly lives alone                          | 40  | 8.68%  |
| Elderly works                                | 53  | 11.50% |
| Household income                             |     |        |
| <500,000 LBP (<18.5 USD)                     | 92  | 20.26% |
| 500,000 - 1,000,000 LBP (18.5-37 USD)        | 100 | 22.03% |
| 1,000,000 - 1,500,000 LBP (37-55.56 USD)     | 121 | 26.65% |
| 1,500,000 - 2,000,000 LBP (55.56-74 USD)     | 75  | 16.52% |
| >2,000,000 LBP (>74 USD)                     | 58  | 12.78% |
| Don't know                                   | 8   | 1.76%  |
| Presence of household debt                   | 403 | 87.42% |
| Debt amount                                  |     |        |
| <500,000 LBP (<18.5 USD)                     | 14  | 3.47%  |
| 500,000 - 1,000,000 LBP (18.5-37 USD)        | 33  | 8.19%  |
| 1,000,000 - 1,500,000 LBP (37-55.56 USD)     | 32  | 7.94%  |
| 1,500,000 - 2,000,000 LBP (55.56-74 USD)     | 38  | 9.43%  |

|                                               | n   | %      |
|-----------------------------------------------|-----|--------|
| >2,000,000 LBP (>74 USD)                      | 280 | 69.48% |
| Don't know                                    | 6   | 1.49%  |
| Primary source of income                      |     |        |
| Transfers from relatives in Lebanon or abroad | 6   | 1.30%  |
| Work wage                                     | 158 | 34.27% |
| Humanitarian assistance                       | 234 | 50.76% |
| Begging                                       | 3   | 0.65%  |
| Savings                                       | 1   | 0.22%  |
| Debt                                          | 19  | 4.12%  |
| Selling assets                                | 3   | 0.65%  |
| Selling assistance                            | 2   | 0.43%  |
| Assistance from charity                       | 27  | 5.86%  |
| Other                                         | 6   | 1.30%  |
| Don't know                                    | 2   | 0.43%  |
| Secondary source of income                    |     |        |
| Transfers from relatives in Lebanon or abroad | 4   | 0.87%  |
| Work wage                                     | 77  | 16.70% |
| Humanitarian assistance                       | 157 | 34.06% |
| Begging                                       | 2   | 0.43%  |
| Savings                                       | 9   | 1.95%  |
| Debt                                          | 146 | 31.67% |
| Selling assets                                | 2   | 0.43%  |
| Selling assistance                            | 6   | 1.30%  |
| Assistance from charity                       | 41  | 8.89%  |
| Other                                         | 5   | 1.08%  |
| Don't know                                    | 12  | 2.60%  |

258

259 A total of 14 participants were consulted in the qualitative component. Their ages ranged

260 between 53 and 82 years old, and 9 (64.3%) were woman. The majority live in ITSs (n=10,

261 71.4%). Table 2 shows a description of the main characteristics of the qualitative component  
 262 participants.

263 **Table 2:** Characteristics of participants in the qualitative interviews  
 264

| Participant ID | Gender | Age range | Governorate | Shelter type |
|----------------|--------|-----------|-------------|--------------|
| P01            | Female | 60-64     | Akkar       | ITS X        |
| P02            | Female | 70-74     | Akkar       | ITS X        |
| P03            | Female | 60-64     | Akkar       | ITS X        |
| P04            | Male   | 65-70     | Akkar       | ITS X        |
| P05            | Female | 55-60     | Akkar       | ITS X        |
| P06            | Male   | 65-70     | Akkar       | hosted       |
| P07            | Male   | 50-54     | Bekaa       | ITS Y        |
| P08            | Male   | 60-64     | Bekaa       | ITS Z        |
| P09            | Male   | 80-84     | Bekaa       | ITS Z        |
| P10            | Female | 65-70     | Bekaa       | ITS Z        |
| P11            | Female | 65-70     | Bekaa       | ITS Z        |
| P12            | Female | 70-74     | Bekaa       | Hosted       |
| P13            | Female | 60-64     | Bekaa       | Hosted       |
| P14            | Female | 55-60     | Bekaa       | Hosted       |

265 *ITS= Informal Tented Settlement*

## 266 **General Feedback on Humanitarian Assistance**

267 Table 3 summarized survey participants' responses on receipt and general assessment of  
 268 humanitarian assistance.

269 **Table 3:** Receipt and assessment of humanitarian assistance

|                                                    | n   | %      |
|----------------------------------------------------|-----|--------|
| Type of assistance received in the past two months |     |        |
| None                                               | 64  | 13.88% |
| Multi-purpose cash assistance card                 | 128 | 27.77% |
| Cash-for-food assistance card                      | 323 | 70.07% |
| Winter cash for heating assistance                 | 241 | 52.28% |
| Food parcels/ assistance                           | 42  | 9.11%  |
| Non-food assistance from charity                   | 10  | 2.17%  |
| Covering healthcare expenses                       | 5   | 1.08%  |



|                                                                                                     | n   | %      |
|-----------------------------------------------------------------------------------------------------|-----|--------|
| Don't know                                                                                          | 6   | 1.30%  |
| Has any humanitarian agency collected data on your needs since the COVID-19 crisis started in 2020? |     |        |
| No                                                                                                  | 298 | 64.64% |
| Health                                                                                              | 137 | 29.72% |
| WASH                                                                                                | 36  | 7.81%  |
| Protection                                                                                          | 5   | 1.08%  |
| Food security and nutrition                                                                         | 30  | 6.51%  |
| Shelter                                                                                             | 16  | 3.47%  |
| Other                                                                                               | 1   | 0.22%  |
| How do you receive information about the humanitarian services?                                     |     |        |
| SMS                                                                                                 | 264 | 57.27% |
| Hotline                                                                                             | 5   | 1.08%  |
| WhatsApp                                                                                            | 11  | 2.39%  |
| Supermarkets                                                                                        | 4   | 0.87%  |
| Posters and leaflets                                                                                | 1   | 0.22%  |
| Reception centers                                                                                   | 2   | 0.43%  |
| Information centers in community centers                                                            | 5   | 1.08%  |
| Distribution points                                                                                 | 4   | 0.87%  |
| Municipality                                                                                        | 0   | 0.00%  |
| Healthcare centers                                                                                  | 0   | 0.00%  |
| Word of mouth (neighbors, relatives)                                                                | 29  | 6.29%  |
| Visits from humanitarian agencies                                                                   | 49  | 10.63% |
| Hasn't received any information                                                                     | 91  | 19.74% |
| Other                                                                                               | 21  | 4.56%  |
| Elderly faced problems in accessing information                                                     | 110 | 24.28% |
| Barriers towards accessing information about services                                               |     |        |
| Financial situation                                                                                 | 10  | 8.06%  |
| Connection to the internet                                                                          | 9   | 7.26%  |
| Being illiterate                                                                                    | 53  | 42.74% |
| Technology                                                                                          | 14  | 11.29% |
| Other                                                                                               | 54  | 43.55% |
| Facing difficulties in comprehending sent information?                                              | 73  | 19.52% |
| Degree of satisfaction about humanitarian response                                                  |     |        |
| Very satisfied                                                                                      | 0   | 0.00%  |
| Satisfied to a great extent                                                                         | 13  | 2.82%  |
| Satisfied to some extent                                                                            | 214 | 46.42% |
| Not satisfied at all                                                                                | 234 | 50.76% |
| Assessment of communication channels                                                                |     |        |

|                                                                        | n   | %      |
|------------------------------------------------------------------------|-----|--------|
| Neither appropriate nor safe                                           | 121 | 26.25% |
| Appropriate                                                            | 117 | 25.38% |
| Safe                                                                   | 56  | 12.15% |
| I don't know anything about communication channels                     | 199 | 43.17% |
| Elderly thinks services have improved over time                        | 38  | 8.30%  |
| Elderly reports having faced negative attitude from humanitarian staff | 32  | 6.96%  |

270

### 271 **Collecting Data on Needs**

272 Most elderly (64.64%) reported never having had their needs assessed by any humanitarian  
273 agency. Less than a third of respondents (29.72%) reported ever being assessed for health needs,  
274 and smaller proportions were ever approached to assess needs in WASH (7.8%), protection  
275 (1.1%), food security and nutrition (6.5%), and shelter sectors (3.5%).

276 No human has knocked on my door to ask how I'm doing. Organizations come and give  
277 money to other people, but nobody hears my voice.

278 P10

### 279 **Access to Information About Services**

280 Around 20% of respondents reported not receiving any information about services from  
281 humanitarian agencies. This was significantly more common in hosted communities (31.2%)  
282 than in ITSs (18.3%) ( $p < 0.001$ ). The top perceived barrier was being illiterate (42.7%) and  
283 43.2% reported not knowing anything about communication channels. Out of those who were  
284 aware of the communication channels, almost half (44.7%) considered them neither  
285 appropriate/easily accessible nor safe/posing no threat.

## 286 Overall Satisfaction

287 On a more global scale, when asked about the degree to which OSRs were satisfied with the  
288 humanitarian response, more than half reported not being satisfied at all (50.7%), and 46%  
289 reported being only satisfied to some extent. Only 13 participants reported being satisfied to a  
290 great extent. Higher dissatisfaction rates were reported by participants in hosted communities  
291 than ITSs ( $p=0.009$ ).

292 I feel there is no justice. They say: ‘Oh this lady, she lives in an apartment’ (not in a tent,  
293 so she must be doing well). Well, do you know how I’m living in this apartment? Do you  
294 know how I’m paying rent? I am a widow and I cannot leave the house to search for  
295 assistance and stand in lines.

296 P13

297 Furthermore, 91.7% of the total sample considered there was no improvement in the services  
298 provided over time. This was also more significantly reported in hosted versus ITS residents  
299 ( $p<0.001$ ). On the other hand, OSRs’ views on humanitarian field workers are positive with  
300 around 93% of OSRs reporting never having faced any negative attitude from humanitarian staff.

## 301 Findings in the shelter sector

302 Table 4 shows the shelter and assets characteristics of the study sample.

303 **Table 4:** Summary of shelter and assets characteristics of the survey sample

|                                                           | n   | %     |
|-----------------------------------------------------------|-----|-------|
| Number of people living in the same shelter (median; IQR) | 6   | 17    |
| Number of rooms in the shelter (median; IQR)              | 2   | 1     |
| Number of hours of electricity                            | 9   | 15    |
| Currently under eviction notice                           | 65  | 14.1% |
| Heating sources                                           |     |       |
| Electric heater                                           | 4   | 0.9%  |
| Diesel heater                                             | 251 | 54.4% |

|                                                                      | n   | %      |
|----------------------------------------------------------------------|-----|--------|
| Charcoal                                                             | 4   | 0.9%   |
| Blankets                                                             | 301 | 65.3%  |
| Gaz (methane) heater                                                 | 9   | 2.0%   |
| Assets                                                               |     |        |
| Mattress                                                             | 284 | 61.6%  |
| Blanket                                                              | 243 | 52.7%  |
| Full set of winter clothing                                          | 98  | 21.3%  |
| Bed                                                                  | 37  | 8.0%   |
| Mobile phone                                                         | 253 | 54.9%  |
| Phone connected to the internet                                      | 225 | 88.9%  |
| Problems in shelter                                                  |     |        |
| Inappropriate for living                                             | 214 | 46.4%  |
| Unsafe                                                               | 9   | 2.0%   |
| Other                                                                | 11  | 2.4%   |
| No problems                                                          | 236 | 51.2%  |
| Contacted humanitarian agencies for assistance about shelter problem | 88  | 39.1%  |
| Humanitarian agencies responsive to shelter issue                    | 8   | 9.1%   |
| Barriers to contacting humanitarian agencies to fix shelter          |     |        |
| Don't know whom and how to contact                                   | 112 | 80.58% |
| Irresponsive staff                                                   | 25  | 17.99% |
| Other                                                                | 2   | 1.44%  |

### 304 **Issues and Unmet Needs**

305 When asked about the quality of their shelter, 51.5% of ITS residents reported the shelter to be  
 306 inappropriate for living, compared to 32.8% of hosted communities. The main reasons that  
 307 rendered their shelter inappropriate were being ‘very cold’ (P02, P13), ‘leaking rainwater’ (P02,  
 308 P05), ‘has mold formations on the wall’ (P07), posing health risks to the elderly residents. Only  
 309 nine OSRs in the quantitative survey considered their shelter unsafe from a security perspective.

310

311 Half of the respondents reported less than 9 hours of electricity per day. The most common  
 312 heating source was blankets (65.3%), followed by diesel heater (54.4%). Around 42.3%  
 313 reported that blankets were their only source for heating.

314 Only 14% of elderly reported living under an eviction notice by the landlord, with the rate  
315 ranging between 9.6% in residential setting to 18.8% in ITSs. Per governorate, the highest  
316 reported eviction rate was reported in Bekaa (20.4%), followed by North and Akkar at 5.2%  
317 and 3.8% respectively.

318 Qualitative consultations have highlighted the issue of high rents. Even for those residing in  
319 tents, the rent cost is burdensome and may vary substantially from one location to another.  
320 For instance, P07 reported 750,000 LBP (34 USD) rent and electricity fees per month,  
321 compared to 500,000 (22.7 USD) paid by P09 living in two camps only a few kilometers  
322 apart. Hosted participants pay significantly higher rents; P12, P13, and P14 residing in a  
323 residential compound in Bekaa pay 1 million LBP (45.45 USD).

## 324 **Humanitarian Assistance and Inclusion**

325 Out of those who reported problems in shelter conditions, only around 40% contacted  
326 humanitarian agencies for assistance. Among those, only 8 participants (9%) reported  
327 humanitarian agencies to be responsive to the complaint. Out of the majority that did not  
328 contact agencies, the most commonly reported barrier was not knowing whom and how to  
329 contact (82%), and around 18% complained about the irresponsiveness of the staff. In  
330 addition, 52.3% of survey respondents reported receiving winter cash assistance for heating.  
331 Interviewed participants revealed that one form of humanitarian assistance was the provision  
332 of heaters and diesel, as well as blankets as part of the winterization assistance for residents  
333 of ITSs, particularly those located in areas highly prone to low temperatures and storms.

334 They gave me those two blankets and two mattresses. I did not have those mattresses  
335 before. [...] I put the mattress on the floor and sleep on it.

336 P01

337 Interviewed participants reported that there was humanitarian provision of canvas to  
338 strengthen and support tents.

339 The tent used to leak rainwater at the beginning of the inter. They gave us canvas, [the  
340 camp chief] gave it to me and the kids installed it. We used to be visible to the street, they  
341 installed it so I don't show, because as you see, my tent is right on the asphalt (street).

342 P05

343 In addition, participants reported receiving diesel heaters and diesel as part of the winter  
344 assistance (P02, P04 P05).

### 345 **Coping Strategies**

346 The high cost of rent forces OSRs to prioritize it over other necessities. For P07, the only  
347 source of income is the food cash assistance provided by the World Food Program (WFP),  
348 amounting to “1,800,000 LBP (81.81 USD)” transferable amount to a card per month for his  
349 entire family of six. The card is used at check-out at contracted supermarkets. Given the high  
350 rent and electricity cost, it is impossible to secure adequate food:

351 The local grocery store just informed me I cannot buy on-credit any more. Now if I have  
352 to pay the rent of the caravan, and I have my son, he cannot pay the rent of his so I pay it  
353 for him, that's 600[000], and say there's 500[000] electricity bill. What remains in my  
354 card? They are right to stop giving me food on credit, they also want to work. [...] Look  
355 at our fridge. There are only a few dates, and we didn't even buy them they were  
356 distributed by a charity.

357 P07

358 In addition, P13 reported that she “had gold rings and bracelets and had to sell them to pay  
359 rents since [they] migrated”. As for coping with the cold weather in light of the high diesel  
360 prices, she reported trimming old clothes and using them as firewood to warm up.

361 We have these blankets, the UN handed them over to us a long time ago. I told my  
362 daughter-in-law to sort whatever we have to give away in the summer; let’s burn them  
363 now [to get warm]. Jackets, clothes, I swear, two blankets, I trimmed them into small  
364 pieced and we have been using them as firewood for the past four days.

365 P13

366 Others resorted to selling diesel heaters and buying methane heaters to reduce consumption  
367 of high diesel (P02). Furthermore, it was common for OSRs to ration usage of the diesel  
368 heater and rely solely on blankets:

369 We have not bought a liter of diesel this winter. They gave us diesel maybe 3 times here.  
370 Once with 20 liters and twice with 10 liters each. We live with that. For example, we do  
371 not turn it on until it’s dark. In the day, we cover up with blankets, because we cannot  
372 afford more diesel. [...] in the evening we turn it on a little, we turn up the heat for a bit  
373 then we turn it off for 10-15 minutes until it’s cold again and we turn it on. This is how  
374 we do, what else could we do?

375 P04

376 Finally, the provision of canvas without installation, especially for OSRs living alone, forces  
377 them to install the canvas themselves, posing high risk of injury.

378 It was raining and the caravan was leaking. I climbed up to put something to stop the  
379 leakage, and it was windy, [...] I fell from the caravan to the ground. On the cement.

380 [...] Afterwards I found myself failing to get up. I deteriorated until I found myself  
 381 on the wheelchair.

382 P08

### 383 Findings in the health sector

384 Table 5 displays the health characteristics of the survey participants.

385 **Table 5:** Summary health characteristics of the survey sample

|                                                              | n   | %      |
|--------------------------------------------------------------|-----|--------|
| Bodily pain over past 4 weeks                                |     |        |
| None                                                         | 48  | 10.41% |
| Very mild                                                    | 15  | 3.25%  |
| Mild                                                         | 65  | 14.10% |
| Moderate                                                     | 160 | 34.71% |
| Severe                                                       | 173 | 37.53% |
| Disability                                                   |     |        |
| Has difficulty seeing, even with eyeglasses                  | 310 | 67.25% |
| Has difficulty hearing, even with hearing device             | 135 | 29.28% |
| Has difficulty walking or climbing stairs                    | 313 | 67.90% |
| Has difficulty bathing                                       | 120 | 26.03% |
| Has difficulty putting on and taking off clothes             | 101 | 21.91% |
| Has difficulty using the bathroom                            | 96  | 20.82% |
| Has difficulty sitting or getting off a chair or bed         | 206 | 44.69% |
| Has difficulty continence                                    | 94  | 20.39% |
| Has difficulty eating                                        | 91  | 19.74% |
| Has difficulty taking care of appearance (combing, grooming) | 71  | 15.40% |
| Has difficulty using the phone                               | 99  | 33.33% |
| Has difficulty using transportation                          | 115 | 28.54% |
| Has difficulty shopping                                      | 93  | 25.62% |
| Has difficulty preparing meals                               | 92  | 37.55% |
| Has difficulty doing housework (laundry, cleaning, ...)      | 138 | 59.48% |
| Has difficulty managing and taking medications on time       | 83  | 19.86% |
| Has difficulty remembering and concentrating                 | 161 | 34.92% |
| Needs a caregiver                                            | 292 | 63.34% |
| Caregiver unavailable                                        | 42  | 14.38% |
| Need for assistive devices                                   |     |        |
| Dentures                                                     | 224 | 48.59% |



|                                             | n   | %      |
|---------------------------------------------|-----|--------|
| Cane/ walking stick                         | 89  | 19.31% |
| Crutches                                    | 29  | 6.29%  |
| Eyeglasses                                  | 281 | 60.95% |
| Hearing device                              | 87  | 18.87% |
| Wheelchair                                  | 17  | 3.69%  |
| Diapers                                     | 14  | 3.04%  |
| <b>Chronic Diseases</b>                     |     |        |
| <b>Diagnosed chronic diseases</b>           |     |        |
| None                                        | 56  | 12.15% |
| Osteoporosis                                | 31  | 6.72%  |
| Disc issues                                 | 112 | 24.30% |
| Hypertension                                | 197 | 42.73% |
| Diabetes                                    | 105 | 22.78% |
| Hypercholesterolemia                        | 57  | 12.36% |
| Cardiovascular Disease                      | 109 | 23.64% |
| Chronic respiratory diseases (COPD, Asthma) | 59  | 12.80% |
| Rheumatoid Arthritis                        | 48  | 10.41% |
| Kidney disease                              | 25  | 5.42%  |
| Cancer                                      | 4   | 0.87%  |
| GI diseases (ulcer)                         | 76  | 16.49% |
| Neurological diseases                       | 40  | 8.68%  |
| Other                                       | 93  | 20.17% |
| Don't know/ refuse to answer                | 3   | 0.65%  |
| <b>Number of chronic diseases</b>           |     |        |
| None                                        | 55  | 12.01% |
| One                                         | 120 | 26.2%  |
| Two                                         | 122 | 26.64% |
| More than two                               | 161 | 35.15% |
| <b>Medication Practices</b>                 |     |        |
| Elderly prescribed medications              | 349 | 86.60% |
| <b>Adherence to medication regimen</b>      |     |        |
| I don't take my meds at all                 | 38  | 10.89% |
| I take my meds as prescribed                | 246 | 70.49% |
| I take my meds but not as prescribed        | 65  | 18.62% |
| <b>Means to get medication</b>              |     |        |
| Out-of-pocket money                         | 219 | 70.42% |
| Subsidized/ at no cost at dispensaries      | 68  | 21.86% |
| Donations from charity                      | 18  | 5.79%  |
| Other                                       | 6   | 1.93%  |

|                                                                                                                                                | n   | %      |
|------------------------------------------------------------------------------------------------------------------------------------------------|-----|--------|
| Elderly resorts to reducing or selling food intake to buy meds                                                                                 | 174 | 56.49% |
| Reasons for non-adherence to medication regimen                                                                                                |     |        |
| Medication unavailable                                                                                                                         | 49  | 47.57% |
| Medication expensive                                                                                                                           | 94  | 91.26% |
| Medication triggered side effects                                                                                                              | 3   | 2.91%  |
| Felt better so stopped taking the medication                                                                                                   | 1   | 0.97%  |
| Distance and transportation to reach pharmacy/ dispensary                                                                                      | 2   | 1.94%  |
| Physical barrier/ unable to go get meds and no one to help                                                                                     | 4   | 3.88%  |
| Used to get meds from Syria                                                                                                                    | 7   | 6.80%  |
| Access to Primary Healthcare                                                                                                                   |     |        |
| How many times did you need primary healthcare during the past 6 months? (Median, IQR)                                                         | 2   | 4      |
| Were you able to access this needed healthcare the last time you needed it?                                                                    | 244 | 78.96% |
| Barriers towards accessing primary healthcare the last time it was needed                                                                      |     |        |
| Distance of health center                                                                                                                      | 9   | 13.85% |
| Transportation cost                                                                                                                            | 30  | 46.15% |
| Physical disability limiting access the health center                                                                                          | 1   | 1.54%  |
| Inadequate welcoming/treatment by health center staff                                                                                          | 5   | 7.69%  |
| Fees doctor visit                                                                                                                              | 28  | 43.08% |
| Cost of drugs/Diagnostic tests/treatment                                                                                                       | 37  | 56.92% |
| Not accepted                                                                                                                                   | 2   | 3.08%  |
| Doesn't know where to go                                                                                                                       | 1   | 1.54%  |
| Long waiting time                                                                                                                              | 8   | 12.31% |
| Other                                                                                                                                          | 3   | 4.62%  |
| Did you pay for the primary health care assistance?                                                                                            |     |        |
| No, totally free                                                                                                                               | 47  | 19.18% |
| Yes, but discounted/subsidized/financial contribution/ cost sharing                                                                            | 131 | 53.47% |
| Yes, household needed to pay in full                                                                                                           | 66  | 26.94% |
| Health Inclusion Indicators                                                                                                                    |     |        |
| Elderly reports available of healthcare services for all their conditions and needs                                                            | 289 | 62.69% |
| Elderly reports affordable healthcare services (including medications)                                                                         | 167 | 36.54% |
| Elderly thinks provided healthcare services are of good quality                                                                                | 329 | 76.33% |
| Elderly thinks they are provided healthcare services on equal basis to others                                                                  | 314 | 69.93% |
| Elderly reports presence of health services by humanitarian agencies that reach them at home if they cannot make it to the healthcare facility | 23  | 5.78%  |

|                                                                                          | n   | %      |
|------------------------------------------------------------------------------------------|-----|--------|
| Elderly reports that healthcare providers take their informed consent before intervening | 398 | 88.84% |
| Elderly reports interrupted care                                                         | 148 | 32.10% |

### 386 **Issues And Unmet Needs**

387 Pain was found to be a significant issue in OSRs; around 37% of participants reported severe  
388 pain, and 34.7% reported moderate pain, while only 10.4% reported not feeling any pain over the  
389 past 4 weeks. Females suffered higher pain levels ( $p < 0.001$ ). Indeed, bodily pain was reported by  
390 five out of eight female OSRs interviewed in the qualitative consultations; it either manifested as  
391 a symptom of diagnosed chronic conditions or as a result of disability.

392           Everywhere hurts. My arms all the way to my hands, my feet, they all hurt. My  
393           shoulders hurt as if they're perforated with a bradawl.

394 P03

395 At the level of functional status, most survey participants (63%) indicated that their health  
396 condition impeded their capacity to engage in work or carry out daily household responsibilities.  
397 Among them, a substantial proportion (87.2%) reported this hindrance persisted for a duration  
398 exceeding three months. The overwhelming majority of respondents (93.3%) reported having  
399 difficulty performing at least one ADL or IADL, and 74.6% reported difficulty performing two  
400 or more. Specifically, 67.2% of respondents reported difficulty seeing even with eyeglasses,  
401 29.3% reported difficulty hearing even with a hearing device, 67.9% reported difficulty walking  
402 or climbing stairs, 26% reported difficulty bathing, and 21.9% reported difficulty putting on and  
403 taking off clothes. Moreover, 20.8% reported difficulty using the bathroom, 44.7% reported  
404 difficulty sitting or getting off a chair or bed, 19.7% reported difficulty eating, 15.4% reported  
405 difficulty taking care of appearance such as combing and grooming, and 33.3% reported  
406 difficulty using the phone. In addition, 28.5% reported difficulty using transportation, 25.6%

407 reported difficulty shopping, 37.6% reported difficulty preparing meals, and 59.5% reported  
408 difficulty doing housework such as laundry and cleaning. Lastly, 19.9% reported difficulty  
409 managing and taking medications on time, and 34.9% reported difficulty remembering and  
410 concentrating (Table 5).

411 Among those interviewed in the qualitative consultations, 7 were living with at least one type of  
412 functional difficulty significantly affecting their quality of life. One participant also had to take  
413 care of her paraplegic spouse:

414           He shouts at me and I'm ill. [...] He wakes up very early, and I need to wake up with  
415           him. Whether I'm good or ill. I came back from my surgery and changed his diaper.

416 P11

417 With respect to the need for assistive devices, 292 respondents (63.34%) reported needing a  
418 caregiver out of whom 14.38% had no caregiver available. Females were significantly more  
419 likely to need care compared to males, even after controlling for age ( $p < 0.001$ ). Nearly half  
420 OSRs (48.59%), two-thirds (60.95%) and 18.87% reported needing dentures, eyeglasses, and  
421 hearing aids, respectively. None of the participants in the qualitative consultations were aware of  
422 an agency providing assistive devices for elderly.

423 The most significant health burden was found to be chronic diseases. A total of 403 (87.4%)  
424 OSRs reported being diagnosed with at least one chronic illness, and a comorbidity rate of  
425 61.4%. Hypertension (HT) was the most frequently reported disease (42.73%) followed by disc  
426 problems (24.30%), diabetes (22.78%), and cardiovascular disease (23.64%). Other conditions  
427 that were reported by a smaller proportion of respondents included respiratory diseases such as  
428 COPD and asthma, rheumatoid arthritis, kidney disease, gastrointestinal diseases such as ulcer,  
429 neurological diseases, and cancer. Females disproportionately suffer more from diabetes

430 (p=0.001), hypertension (p<0.0001), and have more comorbidities than males (p<0.0001), even  
431 after controlling for age. Among the 14 participants in the qualitative component, 10 reported  
432 having at least one chronic disease. Conditions include diabetes (P01, P08, P13, P10), HT (P01,  
433 P02, P06, P13, P14), chronic pain (P03, P02, P05), heart disease (P04, P06), disc problems  
434 (P02), rheumatism (P05), and stomach ulcer (P11).

### 435 **Humanitarian Services and Inclusion**

436 First, humanitarian health actors provide chronic medications for no or subsidized cost at  
437 contracted Primary Healthcare Centers (PHCCs) and dispensaries. Out of those diagnosed with  
438 at least one chronic illness, 86.6% reported being prescribed medications for their condition.  
439 Among those, 70.5% adhered to their regimens, 18.6% took them inconsistently, and 10.9% (38)  
440 didn't take them at all. The most common reason for nonadherence was medication cost, reported  
441 by 91.3% of respondents. Other reasons for nonadherence included medication unavailability  
442 (47.6%), and physical barriers preventing access to medication (3.9%). Very few respondents  
443 reported stopping medication because they felt better or experienced side effects. The most  
444 common means of obtaining medications was out-of-pocket money, reported by 70.4% of  
445 respondents. 21.9% reported obtaining medication through subsidized or no-cost dispensaries,  
446 while smaller proportions reported obtaining medication through donations from charity (5.8%).  
447 Qualitative findings affirmed these insights and shed light on available medication services for  
448 refugees and the emerging challenges. While some funded dispensaries offer chronic  
449 medications for a minimal cost or even free of charge, the economic crisis has severely affected  
450 medication availability.

451 PHCC [X] have two medications on one day, three on another, one on another. With  
452 Doctors Without Borders, we were more content (in reference to the support this  
453 INGO had provided to the PHCC)

454 P04

455 Some types of chronic medications were either not available in dispensaries, or not available in  
456 the country altogether. For those available outside dispensaries, the cost burden prevented OSRs  
457 from purchasing them or adhering to their treatment regimens. They reported “[buying] only one  
458 blister pack because [they] could not afford the entire pack of medication” (P02), and “[she] no  
459 longer has money so [she] stopped buying the painkiller and any other medication” (P03).  
460 Transportation is also a burden to getting medications. P05 reported that she “sometimes send[s]  
461 her teen son] to go get them on foot, so save the 20[000 LBP cost of transportation]”.

462  
463 Second, at PHCCs supported by humanitarian (I)NGOs, medical consultations are subsidized,  
464 costing 3,000 LBP to 5,000 LBP (0.14 USD to 0.23 USD, at the time of data collection).  
465 However, a significant concern was voiced when refugees sought medical assistance at non-  
466 supported PHCCs because these were geographically inaccessible, or because they mistrusted the  
467 services at nearby supported PHCCs due to perceived bad quality of care. This sometimes forced  
468 them to seek care in private clinics, imposing a heavy financial burden.

469 We need to see a doctor. We need to pay, and we don’t have enough money. I swear  
470 he takes 450,000 LBP (21 USD). I don’t go to the PHCC, my daughter, [because]  
471 they don’t know how to treat me. I have diabetes, hypertension, and stomach pain. I  
472 am scared of taking the wrong medication.

473 P01

474 A total of 309 (67%) participants reported needing PHC at least once over the past 6 months. Of  
475 those, 244 (79%) reported being able to access the needed care the last time they needed it.  
476 Barriers to accessing PHC among those were primarily attributed to the cost of drugs/diagnostic  
477 tests/treatment (56.9%), transportation cost (46.2%), fees for doctor visits (43.1%), and the  
478 distance of the health center (13.8%). Most respondents (53.47%) reported paying for primary  
479 health care services, albeit at discounted rates. Only 19.18% received the care free of charge. On  
480 the other hand, 26.94% of participants indicated that they had to make full payments for the  
481 services.

482           They take 3,000 and sometimes 5,000 LBP [...]. My cardiologist and dentist there are  
483           very good, and the ladies (nurses) at the PHCC are very respectful.

484 P05

485       • *Access to Hospitalization*

486 While UNHCR supports up to 75% of the cost for life-saving emergencies and other elective  
487 medical interventions by approval of its Exceptional Care Committee, the remaining  
488 financial burden remained substantial. Additionally, for geographically accessible hospitals  
489 not contracted by UNHCR, refugees were forced to pay completely out-of-pocket, posing a  
490 tremendous financial burden. Moreover, bureaucratic delays from the committee in  
491 approving surgery cost coverage, might be associated with irreversible and devastating  
492 consequences on OSRs' health. P08 shared his experience needing spine surgery after a  
493 domestic accident trying to fix his tent:

494           I told the doctor we cannot afford [the surgery]. He said you can apply to UNHCR to  
495           cover the expenses. I applied. They got back to us after almost one and a half months.  
496           At this point my situation deteriorated a lot. After two months they informed us that

497 the request is rejected and asked for a neurography. The doctor told me I must do the  
498 surgery. He applied again for it; it also took them a month to reply. By that time, I  
499 was done, I needed someone to lift me.

500 P08

501 Considering access to hospitalization, only 87 participants (18.9%) reported needing  
502 hospitalization in the past 6 months, out of whom 23 (73.6%) were able to access it the last  
503 time they needed it. Seven respondents (10.94%) received hospital care totally free of charge,  
504 while 34.3% indicated receiving financial contribution from UNHCR. However, almost 40%  
505 reported having had to pay totally out-of-pocket for hospital care. The most prevalent barriers  
506 to hospitalization were financial (61%), followed by transportation cost (39%).

507  
508 Finally, while laboratory and diagnostic tests were up to 85% covered by UNHCR at  
509 supported PHCCs at the time of the study, qualitative interviews showed that medical images  
510 posed a significant financial burden. The lack of financial assistance in this area added to the  
511 overall struggle faced by elderly refugees in obtaining necessary medical diagnostic services,  
512 especially for those who were unable to afford the remaining 15%.

513 [The lab results of my stomach ulcer biopsy] are out. I could not go get them; I don't  
514 have the money for them. They cost around 80,000 - 90,000 LBP (3.6 to 4 USD)

515 P11

## 516 **Indicators of Inclusion in Health Services**

517 A total of seven indicators were measured to describe several dimensions of health services  
518 inclusivity of OSRs. First, relevance and comprehensiveness of services: Participants were  
519 asked whether there are healthcare services available for all of their conditions and needs.



520 Most of participants (62.69%) responded affirmatively, while 22.78% denied, and 14.53%  
521 did not know. Second, financial accessibility or affordability: The majority of participants  
522 (63.46%) responded that the services were not affordable. Third, reflects OSRs' assessment  
523 of the quality of the healthcare services provided. The majority of participants (76.33%)  
524 reported that the services were of good quality. Fourth, perception of equality in receiving  
525 services. Almost 70% responded that they were provided with healthcare services on an  
526 equal basis compared to others. Fifth, this indicator tackles the dimension of physical  
527 inclusivity for home-bound elderly. A significant majority of participants (81.34%)  
528 responded that there were no healthcare services provided by humanitarian agencies that  
529 reach the respondents at home if they cannot make it to a healthcare facility, while 13.67%  
530 responded that they did not know it existed. Sixth indicator examines the ethical dimension  
531 of provided health services in terms of respecting the elderly's autonomy through informed  
532 consent. The majority of participants (88.84%) responded that healthcare providers explain  
533 what they will do and take the respondents' permission before their intervention. Seventh and  
534 last indicator assesses the continuity of care. Half the respondents (50.5%) reported having  
535 their care continued, while a third (32.1%) reported their care was interrupted when they  
536 should have been referred to other specialists or testing, and 17% reported not knowing the  
537 answer.

### 538 **Coping Strategies**

539 OSRs resort to a number of strategies to cope with the unavailability and high cost of  
540 medications. First, 56.4% reported resorting to reducing food intake or selling food assistance to  
541 buy medications. They may also use their food cash assistance to buy the medications, reducing  
542 the budget allocated for other needs:

543 I pay all the money in my card to buy medication. If it wasn't for the cost of medication I  
 544 would have buy [more] food.

545 P01

546 I get three medications out-of-pocket. Every month I pay 500,000 LBP; the amount of the  
 547 card (food cash assistance) that I receive.

548 P05

549 Furthermore, OSRs incur debt for medication (P01), hospitalization (P11), and medical imaging  
 550 (P08). Finally, 6.8% of survey participants reported obtaining medications from Syria.

551 I do not take my [prescribed] medications. When they get them for me from Syria, I take  
 552 them.

553 P10

## 554 Findings in nutrition and food security

555 Table 6 summarizes the food consumption and coping strategies of the survey sample.

556 **Table 6:** Summary of food consumption and food coping strategies of the survey sample

557

|                                                                                                          | n   | %     |
|----------------------------------------------------------------------------------------------------------|-----|-------|
| Number of meals consumed in the past 24 hours                                                            |     |       |
| 1                                                                                                        | 98  | 21.3% |
| 2                                                                                                        | 312 | 67.7% |
| >2                                                                                                       | 51  | 11.1% |
| In the past four weeks, how often was there ever no food to eat of any kind in your household?           |     |       |
| Never                                                                                                    | 200 | 43.4% |
| Rarely (1-2 times)                                                                                       | 106 | 23.0% |
| Sometimes (3-10 times)                                                                                   | 77  | 16.7% |
| Often (>10 times)                                                                                        | 77  | 16.7% |
| In the past four weeks, how often did you go to sleep at night hungry because there was not enough food? |     |       |
| Never                                                                                                    | 288 | 62.5% |
| Rarely (1-2 times)                                                                                       | 83  | 18.0% |

|                                                                                                                          | n   | %      |
|--------------------------------------------------------------------------------------------------------------------------|-----|--------|
| Sometimes (3-10 times)                                                                                                   | 59  | 12.8%  |
| Often (>10 times)                                                                                                        | 30  | 6.5%   |
| In the past four weeks, how often did you go a whole day and night without eating because there was not enough food?     |     |        |
| Never                                                                                                                    | 352 | 76.69% |
| Rarely (1-2 times)                                                                                                       | 85  | 18.52% |
| Sometimes (3-10 times)                                                                                                   | 20  | 4.36%  |
| Often (>10 times)                                                                                                        | 2   | 0.44%  |
| In the past four weeks, how often did you reduce the number of meals consumed per day because there was not enough food? |     |        |
| Never                                                                                                                    | 89  | 19.3%  |
| Rarely (1-2 times)                                                                                                       | 111 | 24.1%  |
| Sometimes (3-10 times)                                                                                                   | 148 | 32.1%  |
| Often (>10 times)                                                                                                        | 110 | 23.9%  |
| In the past four weeks, how often did you reduce meal size because there was not enough food?                            |     |        |
| Never                                                                                                                    | 65  | 14.19% |
| Rarely (1-2 times)                                                                                                       | 111 | 24.24% |
| Sometimes (3-10 times)                                                                                                   | 147 | 32.10% |
| Often (>10 times)                                                                                                        | 135 | 29.48% |
| In the past four weeks, how often did you have to eat inappropriate food (hard to chew or swallow)?                      |     |        |
| Never                                                                                                                    | 347 | 75.60% |
| Rarely (1-2 times)                                                                                                       | 75  | 16.34% |
| Sometimes (3-10 times)                                                                                                   | 26  | 5.66%  |
| Often (>10 times)                                                                                                        | 11  | 2.40%  |
| Have you been invited to participate in awareness activities about nutrition and food consumption?                       |     |        |
|                                                                                                                          | 443 | 3.7%   |
| Household Hunger Score                                                                                                   |     |        |
| Little or no hunger                                                                                                      | 271 | 58.80% |
| Moderate hunger                                                                                                          | 159 | 34.50% |
| Severe hunger                                                                                                            | 29  | 6.3%   |
| Diet Diversity Score                                                                                                     |     |        |
| 0                                                                                                                        | 3   | 0.7%   |
| 1                                                                                                                        | 90  | 19.5%  |
| 2                                                                                                                        | 155 | 33.6%  |
| 3                                                                                                                        | 109 | 23.6%  |
| 4 or more                                                                                                                | 104 | 22.6%  |

558

559

## 560 **Issues and Unmet Needs**

561 The majority of respondents (79%) have consumed 2 meals per day in the past 24 hours to  
562 the survey. We also used the diet diversity to inspect the consumption of a total of 11 food  
563 groups: milk and milk products, cereals, roots and tubers, fruits and vegetables, meat  
564 products, eggs, fish, legumes, nuts and seeds, fats, sugar, and other. A total of 21% have  
565 consumed 0 or 1 food group, a third consumed 2 food groups, and 22.5% consumed more  
566 than 2 groups. In terms of nutrient groups, OSRs mostly consumed Vitamin B complex  
567 (64.6%), all-source protein (45.12%), and all source vitamin A-rich foods (44%). The least  
568 consumed groups include iron-rich foods (15.84%), zinc-rich foods (20.8%), and calcium-  
569 rich foods (23.4%).

## 570 **Humanitarian Services and Inclusion**

571 The most important food assistance provided is the large-scale distribution of cash-for-food  
572 assistance via an electronic card monthly transfer by the WFP. This type of assistance allows  
573 Syrian refugees to either withdraw their money from ATMs or use the card directly at  
574 contracted supermarkets. The amount of assistance provided depends on the number of  
575 household members at the time this study was conducted. This assistance is received by 70%  
576 of the survey participants, and is deemed crucial but inadequate for accessing food and other  
577 basic needs.

578 [The food assistance] was 40[000] LBP (equivalent to 26.7 USD per person per month).  
579 Now it's 300[000] LBP (equivalent to 13.6 USD per person per month). It is 300[000],  
580 yes but it doesn't do anything at all with the high prices. It has been 3 months now that  
581 my son asks me to get one kilogram of chicken thighs to make *shawarma*.

582 P05

583 The distribution of food parcels has been infrequent since the beginning of the economic  
584 crisis and the COVID-19 pandemic; only 9.1% reported receiving food assistance in the past  
585 two months.

586 The last time [we received food parcels] was last Ramadan. We received 3 parcels in  
587 Ramadan then none. So, it has been almost a year.

588 P08

589

590 and only a tiny percentage (3.7%) of respondents reported being invited to participate in  
591 awareness activities about nutrition, none of which are specifically targeting older people.  
592 None of the participants in the qualitative interviews reported accessing any nutrition  
593 awareness services.

## 594 **Coping Strategies**

595 Results of the household hunger scale indicate that the majority (59%) of respondents  
596 experienced little or no hunger, while a third (34.6%) experienced moderate hunger, and only  
597 6.3% experienced severe hunger. The most commonly experienced negative food coping  
598 strategies include having to reduce the number of meals consumed per day, and reducing  
599 meal size, experienced “sometimes” or “often” in 56% and 61.2% of the cases, respectively.  
600 Qualitative consultations echoed this finding and showed the frequency and severity of  
601 reducing food quantities:

602 As for eating and drinking, for instance if I want to cook today, I calculate how much  
603 I can afford food per day given the monthly budget. Let’s say 40,000- 50,000 LBP (~  
604 2-3 USD). Then I must eat as little as that, because if I eat more, I will have to borrow  
605 money, and if I do, I won’t be able to pay it back.

606 P04

607           How do we spend? As the saying goes: eat so you don't die. [...] Instead of eating  
608           two pieces of bread, we eat half a piece or three quarters of a piece.

609 P06

610   Other participants mentioned resorting to selling some items in the food parcel they receive to  
611   buy their food needs (P04).

## 612 **Findings in water, sanitation, and hygiene**

613   Table 7 summarizes the WASH assessment responses by the survey participants.

614   **Table 7:** Summary of water, sanitation, and hygiene assessment of the survey sample

615

| WASH variables                                                             | n   | %     |
|----------------------------------------------------------------------------|-----|-------|
| <b>Source of drinking water</b>                                            |     |       |
| Household water tap/water network <2 hours per day                         | 54  | 11.7% |
| Piped water to yard/plot                                                   | 3   | 0.7%  |
| Public/shared water stand/taps                                             | 121 | 26.2% |
| Well                                                                       | 88  | 19.1% |
| Bottled mineral water                                                      | 110 | 23.9% |
| Protected spring                                                           | 2   | 0.4%  |
| Water tank/trucked water (UN/NGO provided)                                 | 76  | 16.5% |
| Other                                                                      | 42  | 9.1%  |
| <b>Water problems</b>                                                      |     |       |
| Irregular                                                                  | 79  | 17.1% |
| Dirty                                                                      | 72  | 15.6% |
| Inadequate for drinking                                                    | 53  | 11.5% |
| Inadequate for non-drinking                                                | 27  | 5.9%  |
| Saline                                                                     | 3   | 0.7%  |
| No problems                                                                | 274 | 59.4% |
| <b>Number of times of water shortage over the past 2 weeks</b>             |     |       |
| 0                                                                          | 295 | 64.0% |
| 1                                                                          | 43  | 9.3%  |
| 2                                                                          | 49  | 10.6% |
| >2                                                                         | 74  | 16.1% |
| <b>Did you contact any humanitarian agency to solve the water problem?</b> |     |       |
| No                                                                         | 208 | 82.5% |
| Yes                                                                        |     | 17.5% |

| WASH variables                                                                                                       | n   | %     |
|----------------------------------------------------------------------------------------------------------------------|-----|-------|
| <b>Barriers towards contacting humanitarian agencies about the water problem</b>                                     |     |       |
| Don't know whom to contact/ how to contact                                                                           | 177 | 85.1% |
| Staff irresponsible                                                                                                  | 25  | 12.0% |
| Water humanitarian response considered as effective                                                                  | 18  | 40.9% |
| <b>Type of latrine used</b>                                                                                          |     |       |
| Flush                                                                                                                | 216 | 46.9% |
| Improved pit latrine with cement slab                                                                                | 209 | 45.3% |
| Traditional/Pit latrine with no slab                                                                                 | 34  | 7.4%  |
| Bucket                                                                                                               | 1   | 0.2%  |
| Open air                                                                                                             | 1   | 0.2%  |
| <b>Location of the latrine</b>                                                                                       |     |       |
| Inside the dwelling                                                                                                  | 299 | 64.9% |
| Outside the dwelling - shared                                                                                        | 78  | 16.9% |
| Outside the dwelling - private                                                                                       | 83  | 18.0% |
| <b>Latrine problems</b>                                                                                              |     |       |
| Inappropriate                                                                                                        | 111 | 24.1% |
| Not clean                                                                                                            | 36  | 7.8%  |
| Not safe                                                                                                             | 16  | 3.5%  |
| Far                                                                                                                  | 17  | 3.7%  |
| Appropriate, clean and safe                                                                                          | 313 | 67.9% |
| Did you contact any humanitarian agency to provide a better latrine?                                                 | 27  | 17.4% |
| <b>Barriers towards contacting humanitarian agencies about the latrine problem</b>                                   |     |       |
| Don't know whom to contact/ how to contact                                                                           | 101 | 78.9% |
| Staff irresponsible                                                                                                  | 25  | 19.5% |
| Latrine humanitarian response considered as effective                                                                | 1   | 3.7%  |
| Elderly has access to hygiene items (soap, toothbrush/paste, other)                                                  | 183 | 39.7% |
| Elderly considers they were equally included in water and hygiene awareness sessions with people of other age groups | 213 | 46%   |

616

## 617 **Humanitarian Assistance and Unmet Needs**

618 In ITSs, humanitarian agencies acting in the WASH sector install and maintain water and  
619 sanitation facilities in coordination with the Ministry of Power and Water. Activities include  
620 water trucking and wastewater desludging. On the other hand, refugees in hosted communities  
621 benefit from WASH services similar to Lebanese hosting populations, which are mainly  
622 provided by the water establishments. Humanitarian NGOs also support water establishments

623 maintain consistent and reliable access to water through minor repairs and operational support, as  
624 well as rehabilitation and maintenance of wastewater treatment plants and related infrastructure  
625 [17].

626 In regards to access to water, a quarter of respondents (26.2%) relied on public/shared water  
627 taps, followed by bottled mineral water (23.9%), well water (19.1%), and water tank/trucked  
628 water (16.5%). Notably, 59.4% reported having no water problems, while irregularity (17.1%)  
629 and dirtiness (15.6%) were the most common issues. Concerning water shortages, the majority  
630 (64%) experienced no shortage in the past two weeks, while 16.1% faced shortages more than  
631 twice. Only 17.5% of respondents who reported water problems reached out to humanitarian  
632 agencies for assistance because of uncertainty about whom to contact/how to contact (85.1%)  
633 and unresponsive staff (12%).

634 No, thank God. Water does not cut; there's a lot of water.

635 P01

636 In terms of latrines, flush toilets (46.9%) and improved pit latrines with a concrete slab (45.3%)  
637 were prevalent. The majority (64.9%) had their latrines located inside their dwellings, while 18%  
638 used shared external latrines. Notably, most OSRs considered latrines appropriate, clean, and  
639 safe (67.9%). Only a small proportion (17.4%) of respondents contacted humanitarian agencies  
640 for latrine improvement. The main obstacles reported were uncertainty about whom to  
641 contact/how to contact (78.9%) and unresponsive staff (19.5%). Shared toilets in some of the  
642 bigger ITSs were a controversial issue. While some participants had access to relatively well-  
643 maintained facilities, others highlighted poor hygiene due to over-crowdedness:



644 10 to 12 families share a bathroom. What hygiene would you find? If one woman takes  
645 her son to the bathroom you will have to wash the toilet to [use] it afterwards. We used to  
646 live in a house with two bathrooms. Now we live in a camp so we must bear.

647 P05

648 In addition, shared toilets in relatively big tented settlements pose accessibility challenges for  
649 elderly with disability, because these facilities are usually located at the periphery of the  
650 settlement.

651 If I need to go to the bathroom, I feel embarrassed of the people I force myself to  
652 walk (and not crawl). I stop and rest on my way to the bathroom. My back hurts a lot  
653 – I have two discs, I have rheumatism, my feet hurt.

654 P02

655 As for access to bathing facilities, many elderly refugees, especially in ITs, faced challenges  
656 when it came to showering in shared facilities during the winter due to the cold weather, as  
657 opposed to a warmer, more private ambiance when the bathing facility was inside the tent.

658 I take my baths there, yes, when the weather allows such as today. I bathed yesterday. I  
659 mean [...] in winter we bathe less. It's too cold and windy, we can't.

660 P02

661 With regards to access to hygiene items, approximately 40% of respondents had access to  
662 hygiene items such as soap, dish washing liquid, and cleaning detergents. Only one participant in  
663 the qualitative consultations mentioned this type of assistance, mentioning they were given  
664 “these masks for Corona (COVID-19)” (P01). In terms of inclusion in participation in water and  
665 hygiene awareness sessions, more than half (52%) did not feel equally included with other age  
666 groups.

## 667 Coping strategies

668 More than a quarter of OSRs reported fetching water themselves (28.4%). This practice imposes  
669 physical, financial, and safety burdens on them.

670 They pump water out of the well [for us in the camp]. No one can drink it or use it  
671 except for the bathroom. We have just filled those 8 plastic gallons for 20,000 LBP  
672 (~1 USD) from the water tank. (...) I don't drink from this water; I go fill from a  
673 charity water tap. I take the empty gallons and fill them, then come back on a  
674 passerby's motorcycle.

675 P09

676 Cold and hardly accessible shared bathing facilities outside tents pushes some elderly to bathe  
677 less frequently, and inside the tent, especially during the winter:

678 During the summer we bathe in the bathrooms, but not in the winter. I am scared to  
679 go bathe there. I would fall very ill if I get cold. So, I heat some water [inside the tent]  
680 and bathe here. The water flows like that (outside the tent).

681 P01

## 682 Discussion

683 The current study presents the first extensive insights into unmet needs and humanitarian  
684 inclusion indicators of elderly refugees as reported by OSRs in Lebanon across the shelter,  
685 health, nutrition and food security, and WASH sectors. It used a mixed-methods design which  
686 enriched the findings from each strand by the other. Quantitative findings mainly shed light on  
687 unmet needs and pre-defined indicators of humanitarian inclusion, while qualitative results  
688 revealed perceptions, emotions, and suffering associated with these needs, as well as coping

689 mechanisms not solicited in the quantitative survey, and issues with the humanitarian response.  
690 Integrated results show that OSRs have significant sector-specific and cross-cutting unmet needs  
691 nested under a lack of inclusive humanitarian interventions.

## 692 **Issues, unmet needs, humanitarian assistance and coping strategies**

693 At the level of shelter, slightly less than half of OSRs reported living in inappropriate homes, and  
694 the main complaints raised were high rents, rain leaks, and cold, where a significant proportion  
695 reported blankets as the only source for heating. Humanitarian agencies provide blankets, diesel  
696 heaters and fuel, and canvas to support tents and caravans. Unfortunately, these types of services  
697 are inadequately addressing needs, pushing refugees to prioritize rent over other necessities such  
698 as food, and reducing heater usage.

699 At the level of health, the economic collapse in Lebanon has led to a rise in the cost of healthcare  
700 services and the lack of a universal and complete healthcare coverage, making them increasingly  
701 unaffordable for OSRs. The cost of transportation to reach healthcare facilities was another  
702 considerable barrier, particularly with the soaring prices of fuel and gas. These financial barriers  
703 limited access to essential medical services, exacerbating the health challenges faced by OSRs.  
704 Indeed, a striking majority of OSRs reported suffering from bodily pain. Furthermore, the  
705 majority reported having some type of disability or difficulty to perform daily tasks, and more  
706 than half indicated needing a caregiver. Not surprisingly, 87% of OSRs suffer from at least one  
707 NCD, mainly hypertension, disc problems, and diabetes. The direst need reported in this sector is  
708 for medications that were either unaffordable or unavailable. In addition, OSRs could not afford  
709 undergoing any surgical procedure when not covered by UNHCR or health sector partners,  
710 without going into debt. This posed risk on their lives and wellbeing due to delays and neglect.  
711 Humanitarian assistance does provide coverage for some chronic medications, medical

712 consultations, and hospitalization. However, this coverage is not universal, pushing a significant  
713 proportion of OSRs to partially or totally skip their treatment regimens, to incur debts, and to  
714 spend most of their cash assistance on medication at the expense of food [26, 33, 42]. Access to  
715 healthcare in Lebanon is faced with cost barriers for both Lebanese and Syrians with costs of  
716 services, medications, and transportation hindering access to care [17, 33, 43-45]. Findings in  
717 this sector are consistent with other studies on older refugees in Lebanon [23, 25, 26, 46] and  
718 Jordan [27], which show the high burden of NCDs and difficulties in accessing healthcare. In  
719 Ukraine, older refugees were also found to suffer from a high burden of NCDs [47], and around  
720 34% are in urgent need of chronic medication [48]. These findings are unfortunately consistent  
721 across different disaster settings in LMICs, where older populations affected by disasters have  
722 compelling health needs but lack access to healthcare due to cost barriers [49].

723 At the level of nutrition and food security, most OSRs are poorly nourished with a low diet  
724 diversity score and more than a third belong to moderate hunger on the household hunger scale.  
725 Although some humanitarian assistance includes distribution of food parcels and food cash  
726 assistance by WFP, these don't seem to cover needs given the lack of other sources of income  
727 and deteriorating economic conditions. Main food coping strategies with poverty included  
728 reducing number of meals, meal sizes, and relying on more affordable food types, consistent  
729 with other findings on Syrian refugees in Lebanon [26, 33, 42]. Furthermore, the survey showed  
730 that OSRs are not included in nutrition awareness programs. Given the delicate physiological  
731 status at this life stage, it is imperative that OSRs are able to access food that is clean, diverse,  
732 nutritious, compatible with existing chronic illnesses, and easy to chew and digest. Elderly  
733 refugees can be at high risk of malnutrition due to multiple risk factors related to ageing and the  
734 risks of forced displacement [7, 50-53].

735 Finally, at the level of WASH, some OSRs lacked access to affordable safe drinking water and  
736 appropriate latrines, especially when facilities are shared. Main issues included poor hygiene and  
737 privacy, as well as lack of accommodations for older people with physical disabilities. While  
738 humanitarian agencies have worked in establishing WASH networks at ITSs, ensuring water  
739 trucking and desludging of wastewater, more inclusive programming and design is needed.  
740 Providing appropriate and accessible WASH facilities is a fundamental need to older refugees  
741 who suffer from mobility loss and difficulty in maintaining self-care and hygiene.

## 742 **Humanitarian Inclusion Standards**

743 A key objective of this study is to assess humanitarian inclusion of older refugees using a set of  
744 indicators mapped on five pre-selected HIS's. We do not claim that these indicators are  
745 comprehensive, but we believe they were properly adapted to the context to give preliminary  
746 evidence on the inclusion status as reported by the OSRs themselves.

### 747 **Inclusion standard 1: Identification**

748 This standard is said to be achieved if older refugees are identified to ensure they access relevant  
749 and appropriate services. This requires that age-disaggregated data are collected at all stages of  
750 the response, analyzed and used to inform proper programming and implementation. When  
751 OSRs in this study were asked if they were ever assessed for their needs, two thirds of them  
752 reported never having had their needs assessed by any humanitarian agency.

### 753 **Inclusion standard 2: Safe and equitable access**

754 The second standard uses data from the first to identify barriers and enablers to accessing  
755 assistance. Ultimately, the goal is to address and resolve barriers, and to enhance existing  
756 enablers, while including target groups at all stages in a participatory manner. The study shows

757 that OSRs are facing multiple barriers: *environmental* barriers such as physical barriers with  
758 shared latrines far from the elderly’s residence, and transportation costs to reach healthcare  
759 centers and services. In addition, there are information barriers related to availability of  
760 assistance and services. Second, *institutional* barriers seem to also be present, because no needs  
761 assessments or age-sensitive interventions have been done specifically with OSRs despite most  
762 of the sample being in camps that are highly reachable by humanitarian agencies. This reflects  
763 either a lack of a policy, or a lack of implementation of existing policies.

#### 764 **Inclusion standard 4: Knowledge and participation**

765 Study findings show a lack of any type of approach to OSRs to inform them of their rights or and  
766 entitlements, and participate in decisions affecting their lives, such as to consult with them about  
767 designing services for them.

#### 768 **Inclusion standard 5: Feedback and complaints:**

769 The fifth standard assures safe and accessible feedback and complaints channels. The study  
770 showed that at the level of basic assistance, shelter, WASH, OSRs failure to reach out to  
771 humanitarian organizations for complaints or requests is due to their lack of knowledge about the  
772 “who” and “how”, as well as agencies’ unresponsiveness.

#### 773 **Inclusion standard 7: Learning**

774 While the learning standard is best assessed through an evaluation of organizational processes,  
775 one subjective high-level indicator is whether improvement in the quality of the intended  
776 outcome is perceived to have occurred. Our findings show that more than 90% of OSRs reported  
777 no improvement of provided services to them over time.

778 These findings from OSRs’ perspective complement results from Abi Chahine’s recent study  
779 assessing inclusion from humanitarian actors’ perspectives [14], showing the other side of the  
780 same coin. It was evident that service providers are indeed blinded to the needs of OSRs, and  
781 that ageist perceptions at the micro-level of institutions “excluded [elderly refugees] from  
782 livelihood programs, vocational training and cash assistance because their age identified them as  
783 “unproductive””. This exclusion could stem from ageist stereotypes and beliefs, as well as gaps  
784 in knowledge, policies, and standard operating procedures at the level of humanitarian  
785 organizations. Hence, study findings further support the body of evidence on older people’s  
786 exclusion in humanitarian response [11, 12, 15, 16].

## 787 **Limitations**

788 The study findings must be read in light of its limitations. While the study employs two strands  
789 for triangulation and expansion increasing its credibility, not all findings were generated from  
790 both strands; some findings, especially those on coping strategies were revealed rather  
791 inductively in the qualitative strand. In addition, the study uses non-probability sampling  
792 approaches which induces selection bias due to the non-representative nature of the sample.  
793 While this might affect the generalizability of our findings, it's important to note that the settings  
794 we have visited are not representative of the overall ITS and hosted status in Lebanon; the  
795 sample was more biased towards better rather than worse living circumstances and humanitarian  
796 attention, especially the ITS sample included in the qualitative component which came from  
797 mainly two large ITSs. In addition, the hosted community sample in both the survey and the  
798 qualitative component are smaller in size and may also be biased to more convenient and  
799 accessible sites. Hence, we claim that our study presents a relatively polished depiction of the  
800 reality of older refugees in Lebanon. Second, due to logistical reasons, we were not able to

801 include qualitative insights from older refugees in hosted settings from the North governorate.  
802 However, we believe that insights shared by other participants are generalizable. Finally, the  
803 presence of measurement bias stemming from the interaction between interviewers and  
804 interviewees is possible. Variations in spoken dialects could have introduced inconsistencies in  
805 the data collection process. However, efforts were made to mitigate these biases through rigorous  
806 training and standardized protocols, on-the-field monitoring, and interim quality control of data,  
807 resulting in insignificant effects on results.

## 808 **Implications and recommendations for the humanitarian system**

809 Working by the humanitarian principle of humanity entails striving to achieve equity across the  
810 different vulnerable segments that the response strives to serve. Lebanon’s “no-refugee policy”  
811 [20], compounded by deteriorating socioeconomic and political crises, exacerbates Syrian  
812 refugees precarious living conditions, under which older refugees immensely suffer. While  
813 significant efforts have been exerted by the government and the humanitarian eco-system to  
814 provide access to services to refugees in general, needs remain substantial and age-conscious  
815 interventions are lacking.

816 Two overarching considerations should be adopted by the humanitarian system to be more  
817 inclusive of older refugees. First, a paradigm shift must take place towards the more sustainable  
818 programming in the humanitarian-development nexus appropriate for a protracted crisis setting.  
819 This consideration resolves key issues affecting the lives of all residents, including the most  
820 vulnerable such as older refugees. Second, age-sensitivity must be mainstreamed as a cross-  
821 cutting consideration across all levels and phases of the humanitarian response. This starts with  
822 funding; since only less than 1% of humanitarian funding worldwide addressed elderly needs  
823 [16], humanitarian actors must advocate for funding tailored and inclusive programs targeting



824 older refugees. In addition, baseline and needs assessments must collect age-disaggregated data  
825 to “see” the issues and vulnerabilities specific to older people. Programming must be based on  
826 inclusive needs assessments and a participatory human-centered approach. This could employ a  
827 “twin-track approach” ensuring the inclusion of OP into programs directed at the general  
828 population, and designing interventions tailored to the specific needs and issues of the elderly.  
829 Furthermore, monitoring and evaluation must incorporate age-disaggregated data for all  
830 performance indicators in blanket programs, and specific indicators for the tailored interventions  
831 targeting older people in emergencies. Participatory approaches should be adopted across the  
832 different activities related to accountability to affected populations, increasing the sense of  
833 participation and resilience, and leveraging on existing skills and experiences. All these phases  
834 and steps must be governed by detailed and nuanced age-inclusive standards adopted by  
835 humanitarian agencies into their policies, the implementation of which is diligently monitored  
836 [22].

837 Following these considerations, sector-specific recommendations can be proposed to enhance  
838 inclusion of OSRs guided by the ADCAP HISs. Because of Lebanon’s no-camp-policy and  
839 ambiguous regulations, it is crucial to find local solutions and designs more fitting for a  
840 protracted crisis and which abide to UNHCR shelter standards of protection [54, 55]. Research  
841 and development efforts engaging the government, UNHCR, academic institutions, and donors  
842 may serve as a working team to produce appropriate solutions. Shelter actors should also strive  
843 to relieve the burden of high rents by budgeting for rent support. WASH facilities must be within  
844 the residential units where possible. Alternatively, in ITSs with shared sanitation units,  
845 households with older people must be prioritized in being located closer to them and  
846 accommodations must be in place to assist those with limited functional status. Humanitarian

847 health actors must act to increase appeals for chronic medications and hospitalizations, a  
848 challenge that may hinder service provision [27]. Alternatively, health cash vouchers that cover  
849 transportation, consultation, hospitalizations in non-contracted PHCCs, hospitals, and  
850 dispensaries and for non-supported and unavailable medications may be a plausible solution for  
851 elderly [56]. In addition, and in response to an overstretched healthcare system and staff, the  
852 government could consider special policies for integrating Syrian healthcare labor in remote  
853 areas where Lebanese systems are more fragile and inadequate to cover local needs [57]. As for  
854 nutrition and food needs, it is evident that the food coping strategies come as a result of  
855 prioritizing rent and electricity bills as well as medications, which are all spent from the cash  
856 assistance card, leaving little for food expenditure especially in households whose only source of  
857 income is the cash transfer. Because the cash for food assistance is only granted to registered  
858 refugees, other parties and humanitarian actors may need to provide and cover for non-registered  
859 refugees [58]. A holistic and complementary approach between sectors is needed to alleviate  
860 these burdens by addressing the high rents and the health needs, leaving the cash-for-food  
861 assistance primarily and adequately for food expenditure, especially when cash assistance is also  
862 granted to non-registered refugees through other organizations. The presence of elderly people  
863 with exacerbated vulnerabilities such as need for chronic medications and disability must be  
864 given significant importance in household vulnerability assessments used for the selection of  
865 granted households [58].

866 Other modalities include community-based interventions such as community kitchens [59],  
867 especially in closed ITSs providing a sustainable solution if also coupled with a business  
868 dimension beyond the philanthropic mandate [60]. This would be very appealing to the younger  
869 and more functionally capable older women, especially in light of their lifetime experience

870 cooking homemade meals and the limited income sources under work restrictions. Other  
871 sustainable livelihoods opportunities include agriculture projects which could leverage on the  
872 legal possibility and refugees' farming experience, especially that the vast majority of ITS  
873 residents came from rural areas in Syria [61, 62]. These initiatives can improve refugee-host  
874 relations, food security, nutritional status, and income through additional agricultural small  
875 businesses selling products prepared by refugees from the farm to the fork, including school food  
876 programs [62, 63].

877 On another note, further research is needed to support the evidence-base that (1) shows the  
878 vulnerabilities of older people in disasters and protracted crises, (2) fills gaps in understanding  
879 their needs and the ways to address them, (3) designs and evaluates the relevance, effectiveness,  
880 and impact of inclusive interventions, and (4) designs the age-conscious monitoring and  
881 evaluation tools to be used during and after implementation [15, 49, 64].

## 882 **Acknowledgements**

883 Authors would like to first express their sincere gratitude to all participants interviewed in this  
884 study. We would like to also acknowledge the Union of Relief and Development Associations  
885 for facilitating the access of the research team to the Syrian refugee beneficiaries residing in the  
886 informal tented settlements and hosted communities, and the field data collectors of the survey.  
887 A special thank you to Mr. Amir Abbass and Ms. Amale Kassir who assisted in reviewing the  
888 survey tools and Mr. Rida Mourad who assisted in supervising field work and transcription of the  
889 key informant interviews.

## 890 **References**

- 891 1. United Nations Department for Economic and Social Affairs. World Population Ageing 2019.  
892 2019.
- 893 2. United Nations Department for Economic and Social Affairs. World Population Ageing 2020:  
894 Highlights. 2020.
- 895 3. HelpAge International. Developing Countries Face Ageing Revolution. 2015.
- 896 4. United Nations Higher Commissioner for Refugees. Older persons 2023 [Available from:  
897 <https://www.unhcr.org/what-we-do/protect-human-rights/safeguarding-individuals/older-persons>.
- 898 5. Barbelet V. Older people in displacement: Falling through the cracks of emergency responses.  
899 Overseas Development Institute; 2018.
- 900 6. HelpAge International. The neglected generation: The impact of displacement on older people.  
901 2012.
- 902 7. HelpAge International. Protection interventions for older people in emergencies. 2013.
- 903 8. Nations U. Political Declaration and Madrid International Plan of Action on Ageing. 2002.
- 904 9. United Nations Higher Commissioner for Refugees. UNHCR's Policy on Older Refugees. 2000.
- 905 10. United Nations Higher Commissioner for Refugees. UNHCR Policy on Age, Gender, and  
906 Diversity. 2018.
- 907 11. Burton A, Breen C. Older refugees in humanitarian emergencies. *The Lancet*. 2002;360:s47-s8.
- 908 12. Karunakara U, Stevenson F. Ending Neglect of Older People in the Response to Humanitarian.  
909 2012.
- 910 13. Duault LA, Brown L, Fried L. The elderly: an invisible population in humanitarian aid. *The*  
911 *Lancet Public Health*. 2018;3(1):e14.
- 912 14. Abi Chahine M, Kienzler H. Ageism, an invisible social determinant of health for older Syrian  
913 refugees in Lebanon: a service providers' perspective. *Conflict and Health*. 2022;16(1):62.

- 914 15. Kaga M, Nakache D. Whose needs count in situations of forced displacement? Revaluing older  
915 people and addressing their exclusion from research and humanitarian programmes. *International Journal*  
916 *of Migration and Border Studies*. 2019;5(1-2):134-51.
- 917 16. International H. *End the neglect: A study of humanitarian financing for Older People* 2016.
- 918 17. *Lebanon Crisis Response Plan 2023*. 2023.
- 919 18. Atrache S. Lebanon at a crossroads: Growing uncertainty for Syrian refugees. *Refugees*  
920 *International*. 2020:1-24.
- 921 19. Sanyal R. A no-camp policy: Interrogating informal settlements in Lebanon. *Geoforum*.  
922 2017;84:117-25.
- 923 20. Janmyr M. No Country of asylum: 'Legitimizing' Lebanon's rejection of the 1951 refugee  
924 convention. *International Journal of Refugee Law*. 2017;29(3):438-65.
- 925 21. Kikano F, Fauveaud G, Lizarralde G. Policies of Exclusion: The Case of Syrian Refugees in  
926 Lebanon. *Journal of Refugee Studies*. 2021;34(1):422-52.
- 927 22. CBM International, HelpAge International, Handicap International. *Humanitarian inclusion*  
928 *standards for older people and people with disabilities*. 2018.
- 929 23. Hachem S, Ali S, Al-Omari S, Abi Chahine M, Fahme SA, Mehio Sibai A. "Older people tend to  
930 be invisible": a qualitative study exploring the needs and inclusion of older Syrian refugees in the context  
931 of compounding crises in host country, Lebanon. *Conflict and Health*. 2022;16(1):61.
- 932 24. Abi Zeid B, El Khoury T, Ghattas H, Alawieh MF, Ramadan Z, Anouti S, et al. Predictors and  
933 barriers to vaccination among older Syrian refugees in Lebanon: a cross-sectional analysis of a multi-  
934 wave longitudinal study. *The Lancet Healthy Longevity*. 2023;4(5):e219-e27.
- 935 25. McCall SJ, El Khoury T, Salibi N, Abi Zeid B, El Haddad M, Alawieh MF, et al. Development of  
936 a prediction model for the management of noncommunicable diseases among older Syrian refugees  
937 amidst the COVID-19 pandemic in Lebanon. *JAMA Network Open*. 2022;5(10):e2231633-e.
- 938 26. Strong J, Varady C, Chahda N, Doocy S, Burnham G. Health status and health needs of older  
939 refugees from Syria in Lebanon. *Conflict and health*. 2015;9:1-10.

- 940 27. Lupieri S. ‘Vulnerable’but not ‘Valuable’: older refugees and perceptions of deservingness in  
941 medical humanitarianism. *Social Science & Medicine*. 2022;301:114903.
- 942 28. Nashwan A, Sobh M, Khamaysa I, Harahsheh M, Salem H. Quality of Life among Older Syrian  
943 Refugees in Jordan: Quantitative Study. *Dirasat: Human and Social Sciences*. 2022;49(4):480-91.
- 944 29. Özmete E, Pak M, Duru S. Problems and issues concerning social integration of elderly refugees  
945 in Turkey. *Journal of Refugee Studies*. 2022;35(1):93-121.
- 946 30. Apak E, Artan T, Ozucelik DN. Evaluation of bio-psycho-social and socio-cultural problems of  
947 Syrian elderly living in Turkey. *International Journal of Social Psychiatry*. 2023;69(2):454-66.
- 948 31. Creswell JW, Clark VLP. *Designing and Conducting Mixed Methods Research*. Third ed: SAGE  
949 Publications, Inc.; 2018.
- 950 32. Situation Syria Regional Refugee Response 2023 [Available from:  
951 <https://data.unhcr.org/en/situations/syria>.
- 952 33. Vulnerability Assessment of Syrian Refugees in Lebanon (VASyR). 2022.
- 953 34. Wallace M, Shelkey M. Katz index of independence in activities of daily living (ADL). *Nursing  
954 Clinics of North America*. 2007;39(3):473-93.
- 955 35. Coyne R, AGACNP-BC WK. The Lawton instrumental activities of daily living (IADL) scale.  
956 *Gerontologist*. 2019;9(3):179-86.
- 957 36. Statistics WGoD. The Washington Group Short Set on Functioning (WG-SS) - Arabic  
958 Translation. WG-SS. 2020.
- 959 37. Rapid assessment method for older people (RAM-OP). A Manual.: HelpAge International; 2016.
- 960 38. Sandelowski M. Whatever happened to qualitative description? *Research in nursing & health*.  
961 2000;23(4):334-40.
- 962 39. Sandelowski M. What's in a name? Qualitative description revisited. *Research in nursing &  
963 health*. 2010;33(1):77-84.
- 964 40. Fetters MD, Tajima C. Joint displays of integrated data collection in mixed methods research.  
965 *International Journal of Qualitative Methods*. 2022;21:16094069221104564.

- 966 41. O'cathain A, Murphy E, Nicholl J. The quality of mixed methods studies in health services  
967 research. *Journal of health services research & policy*. 2008;13(2):92-8.
- 968 42. Nabulsi D, Ismail H, Abou Hassan F, Sacca L, Honein-AbouHaidar G, Jomaa L. Voices of the  
969 vulnerable: Exploring the livelihood strategies, coping mechanisms and their impact on food insecurity,  
970 health and access to health care among Syrian refugees in the Beqaa region of Lebanon. *PLoS One*.  
971 2020;15(12):e0242421.
- 972 43. Saleh A, Aydin S, Koçak O. A comparative study of Syrian refugees in Turkey, Lebanon, and  
973 Jordan: Healthcare access and delivery. *OPUS International Journal of Society Researches*.  
974 2018;8(14):448-64.
- 975 44. Akik C, Ghattas H, Mesmar S, Rabkin M, El-Sadr WM, Fouad FM. Host country responses to  
976 non-communicable diseases amongst Syrian refugees: a review. *Conflict and Health*. 2019;13(1):8.
- 977 45. Blanchet K, Fouad FM, Pherali T. Syrian refugees in Lebanon: the search for universal health  
978 coverage. *Conflict and health*. 2016;10:1-5.
- 979 46. Chemali Z, Borba CP, Johnson K, Khair S, Fricchione GL. Needs assessment with elder Syrian  
980 refugees in Lebanon: Implications for services and interventions. *Global public health*. 2018;13(9):1216-  
981 28.
- 982 47. Piotrowicz K, Semeniv S, Kupis R, Ryś M, Perera I, Gryglewska B, et al. Disease burden in older  
983 Ukrainian refugees of war: a synthetic reanalysis of public records data. *The Lancet Healthy Longevity*.  
984 2022;3(10):e667-e73.
- 985 48. Armocida B, Ussai S, Pavlovysh M, Valente M, Missoni E, Pistis M, et al. Older people:  
986 forgotten victims amid the Ukrainian humanitarian disaster. *Lancet Public Health*. 2022;7(5):e402-e3.
- 987 49. Massey E, Smith J, Roberts B. Health needs of older populations affected by humanitarian crises  
988 in low-and middle-income countries: a systematic review. *Conflict and health*. 2017;11(1):1-21.
- 989 50. Alam MS, Sultana R, Haque MA. Vulnerabilities of older adults and mitigation measures to  
990 address COVID-19 outbreak in Bangladesh: A review. *Social Sciences & Humanities Open*.  
991 2022;6(1):100336.



- 992 51. Pieterse S, Ismail S. Nutritional risk factors for older refugees. *Disasters*. 2003;27(1):16-36.
- 993 52. Pieterse S, Manandhar M, Ismail S. The nutritional status of older Rwandan refugees. *Public*  
994 *Health Nutrition*. 1998;1(4):259-64.
- 995 53. Pieterse S, Manandhar M, Ismail S. The association between nutritional status and handgrip  
996 strength in older Rwandan refugees. *European journal of clinical nutrition*. 2002;56(10):933-9.
- 997 54. United Nations Higher Commission for Refugees. Shelter, Camp and Settlement [Available  
998 from: <https://emergency.unhcr.org/emergency-assistance/shelter-camp-and-settlement>.
- 999 55. Shelter and Settlement Section. Shelter Design Catalogue. In: United Nations Higher  
1000 Commission for Refugees, editor. 2016.
- 1001 56. World Health Organization, Global Health Cluster CTT. Role of Cash & Voucher Assistance for  
1002 health outcomes: Using the Health Barriers Framework to determine the appropriate response. 2021.
- 1003 57. Honein-AbouHaidar G, Noubani A, El Arnaout N, Ismail S, Nimer H, Menassa M, et al. Informal  
1004 healthcare provision in Lebanon: an adaptive mechanism among displaced Syrian health professionals in  
1005 a protracted crisis. *Conflict and health*. 2019;13:1-11.
- 1006 58. Janmyr M, Mourad L. Modes of Ordering: Labelling, Classification and Categorization in  
1007 Lebanon's Refugee Response. *Journal of Refugee Studies*. 2018;31(4):544-65.
- 1008 59. Ibrahim N, Honein-AbouHaidar G, Jomaa L. Perceived impact of community kitchens on the  
1009 food security of Syrian refugees and kitchen workers in Lebanon: Qualitative evidence in a displacement  
1010 context. *PloS one*. 2019;14(1):e0210814.
- 1011 60. Sahyoun NR, Jamaluddine Z, Choufani J, Mesmar S, Reese-Masterson A, Ghattas H. A mixed-  
1012 methods evaluation of community-based healthy kitchens as social enterprises for refugee women. *BMC*  
1013 *public health*. 2019;19:1-11.
- 1014 61. Muhangi J, Ainamani H, Opio F. Contribution of Agriculture in the Enhancement of Refugees  
1015 Livelihoods in Nakivale Settlement. *Open Journal of Applied Sciences*. 2022;12(9):1505-26.
- 1016 62. Nations FaAOotU. The transformative role of agriculture in refugee settings: Amplifying the  
1017 voices of refugees and host communities. 2023.

- 1018 63. Ghattas H, Choufani J, Jamaluddine Z, Masterson AR, Sahyoun NR. Linking women-led  
1019 community kitchens to school food programmes: lessons learned from the Healthy Kitchens, Healthy  
1020 Children intervention in Palestinian refugees in Lebanon. *Public Health Nutrition*. 2020;23(5):914-23.
- 1021 64. Böcker A, Hunter A. Older Refugees and Internally Displaced People in African Countries:  
1022 Findings from a Scoping Review of Literature. *Journal of Refugee Studies*. 2022:feac023.
- 1023
